# Supplementary material
Source: PubMed Central journal article supplement (PMC534723)

**wt on1 on2 A1- A2- DM**

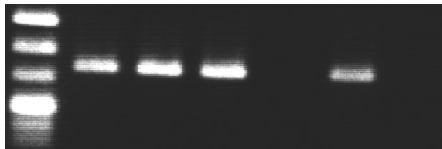

*babA1*

**wt on1 on2 A1- A2- DM**

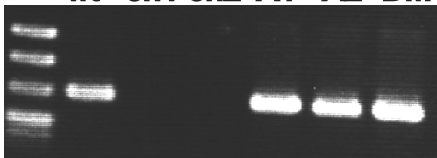

*babB*

**wt on1 on2 A1- A2- DM**

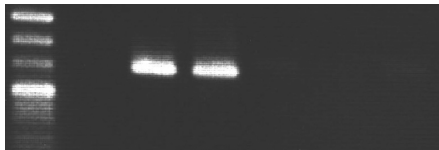

*babB/A*

Supplement: pnas_101_48_16923__1.pdf [file pnas_101_48_16923__1.pdf]
